# Supplementary figures and images for: Faecal calprotectin and gut microbiota do not predict enteropathy in very preterm infants
Source: PubMed Central journal article supplement — Acta Paediatr. 2020 Sep 1;110(1):109–16. doi: 10.1111/apa.15354 (PMC7818215; doi:10.1111/apa.15354), 2020-09-01

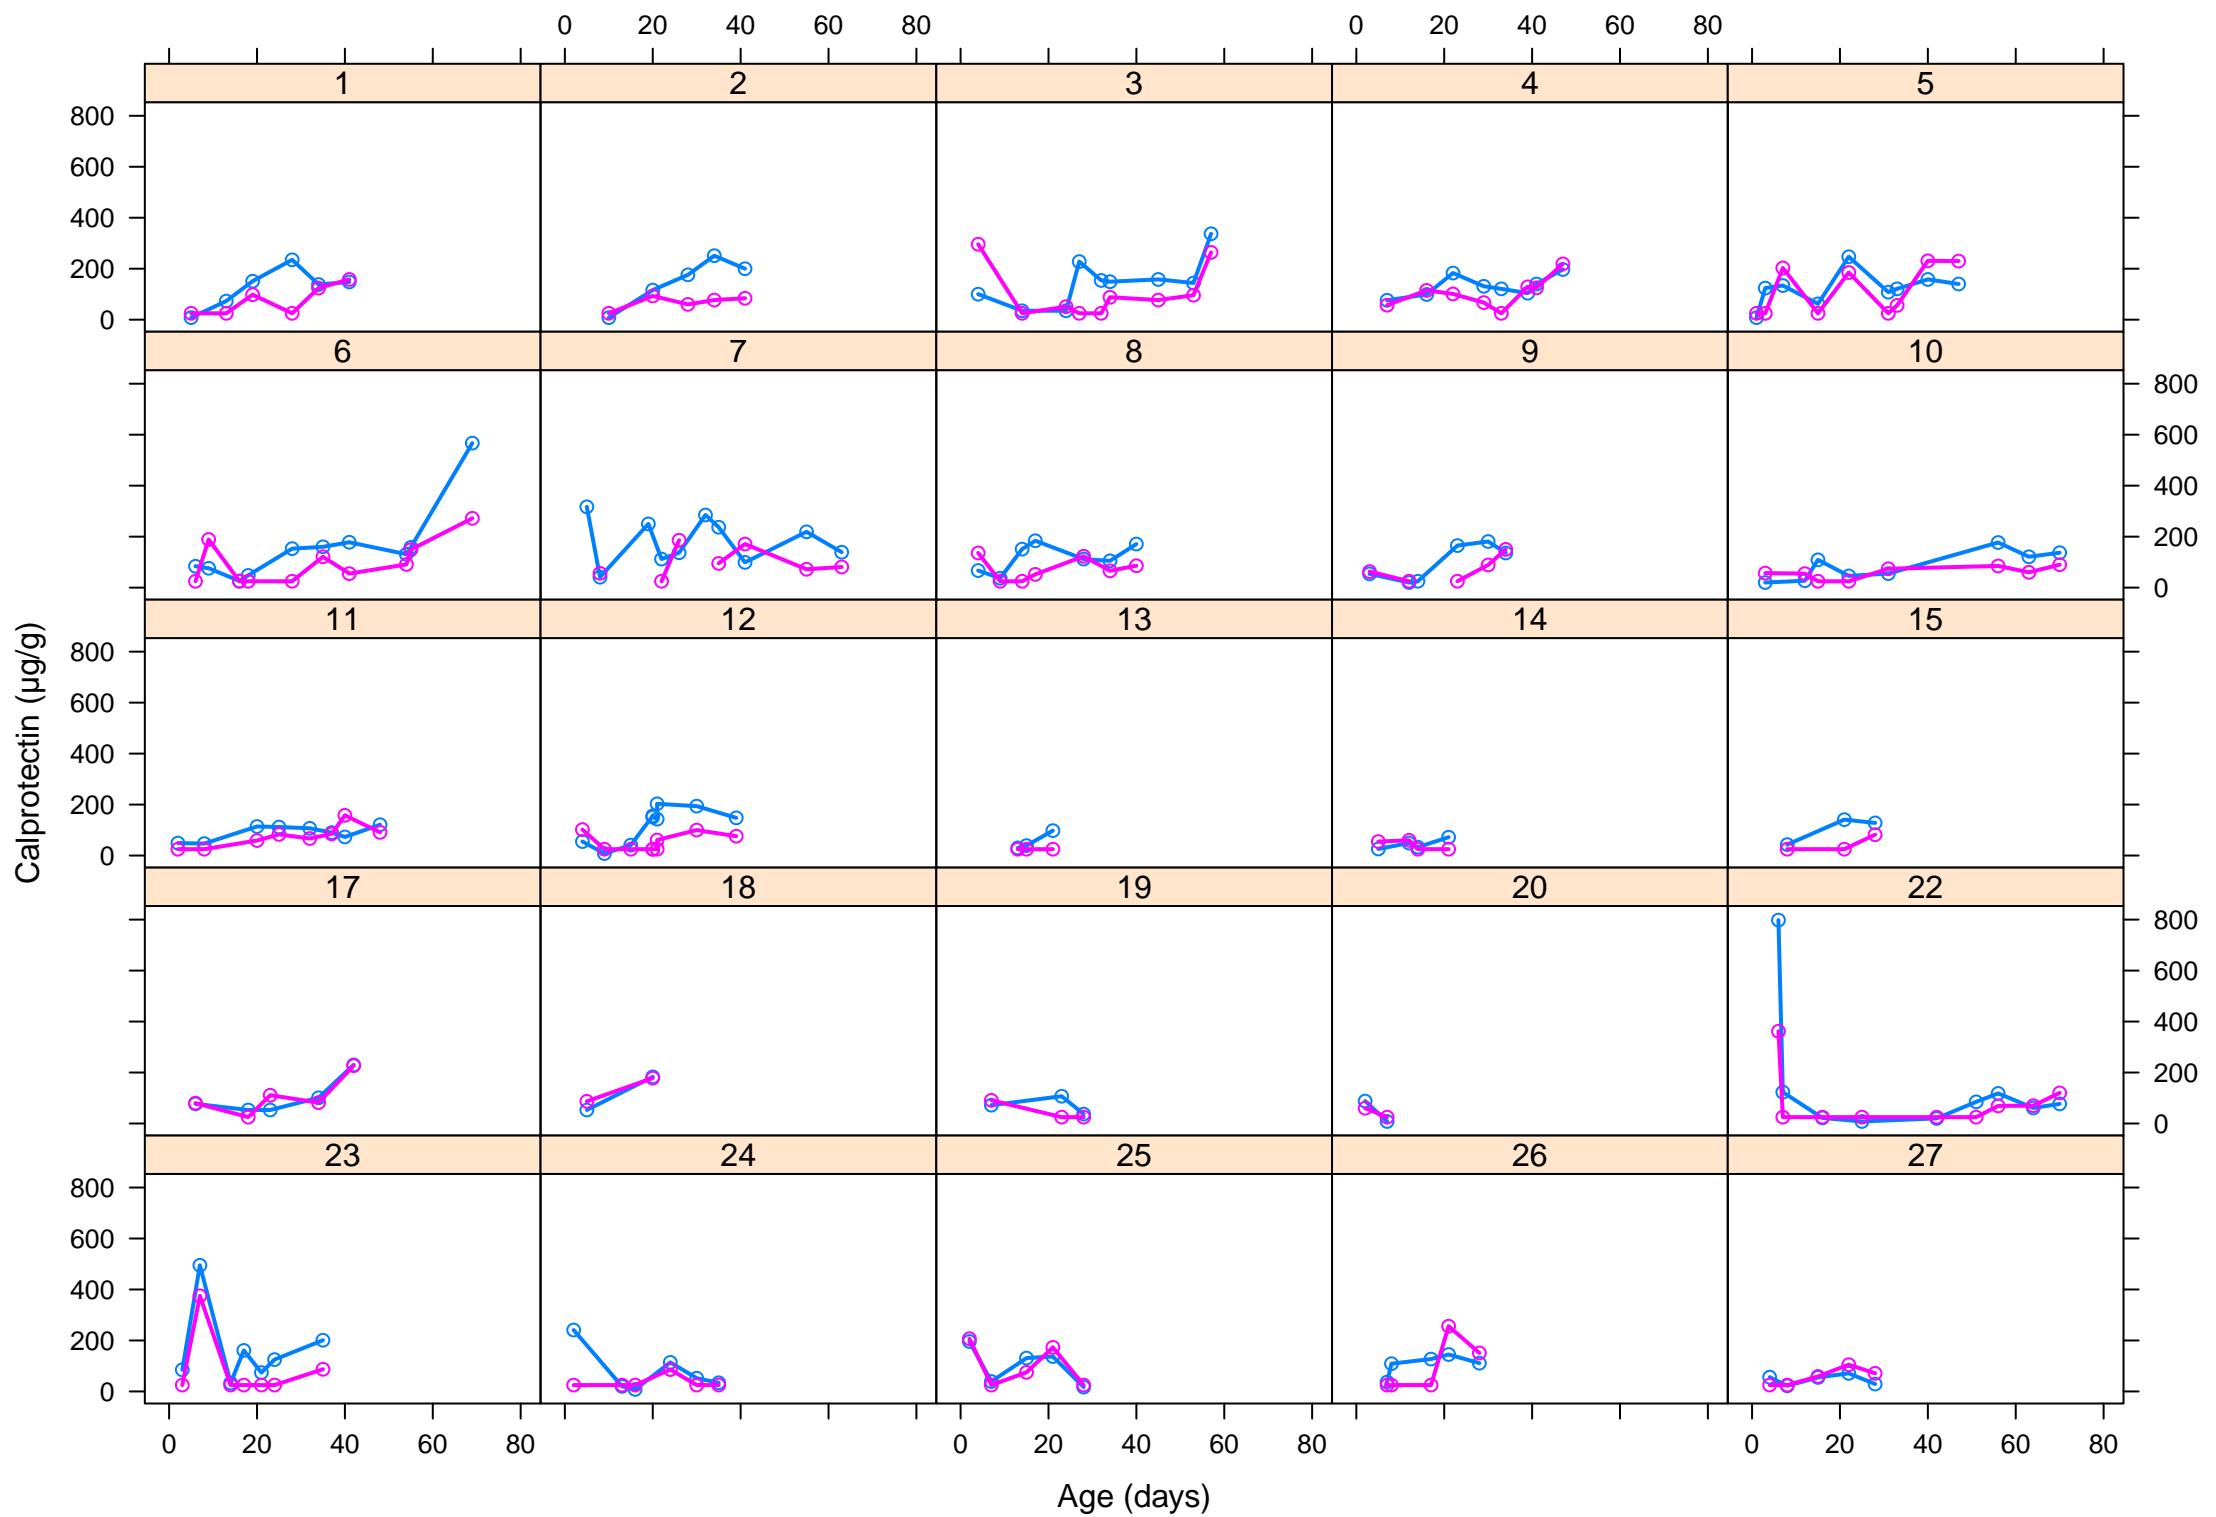

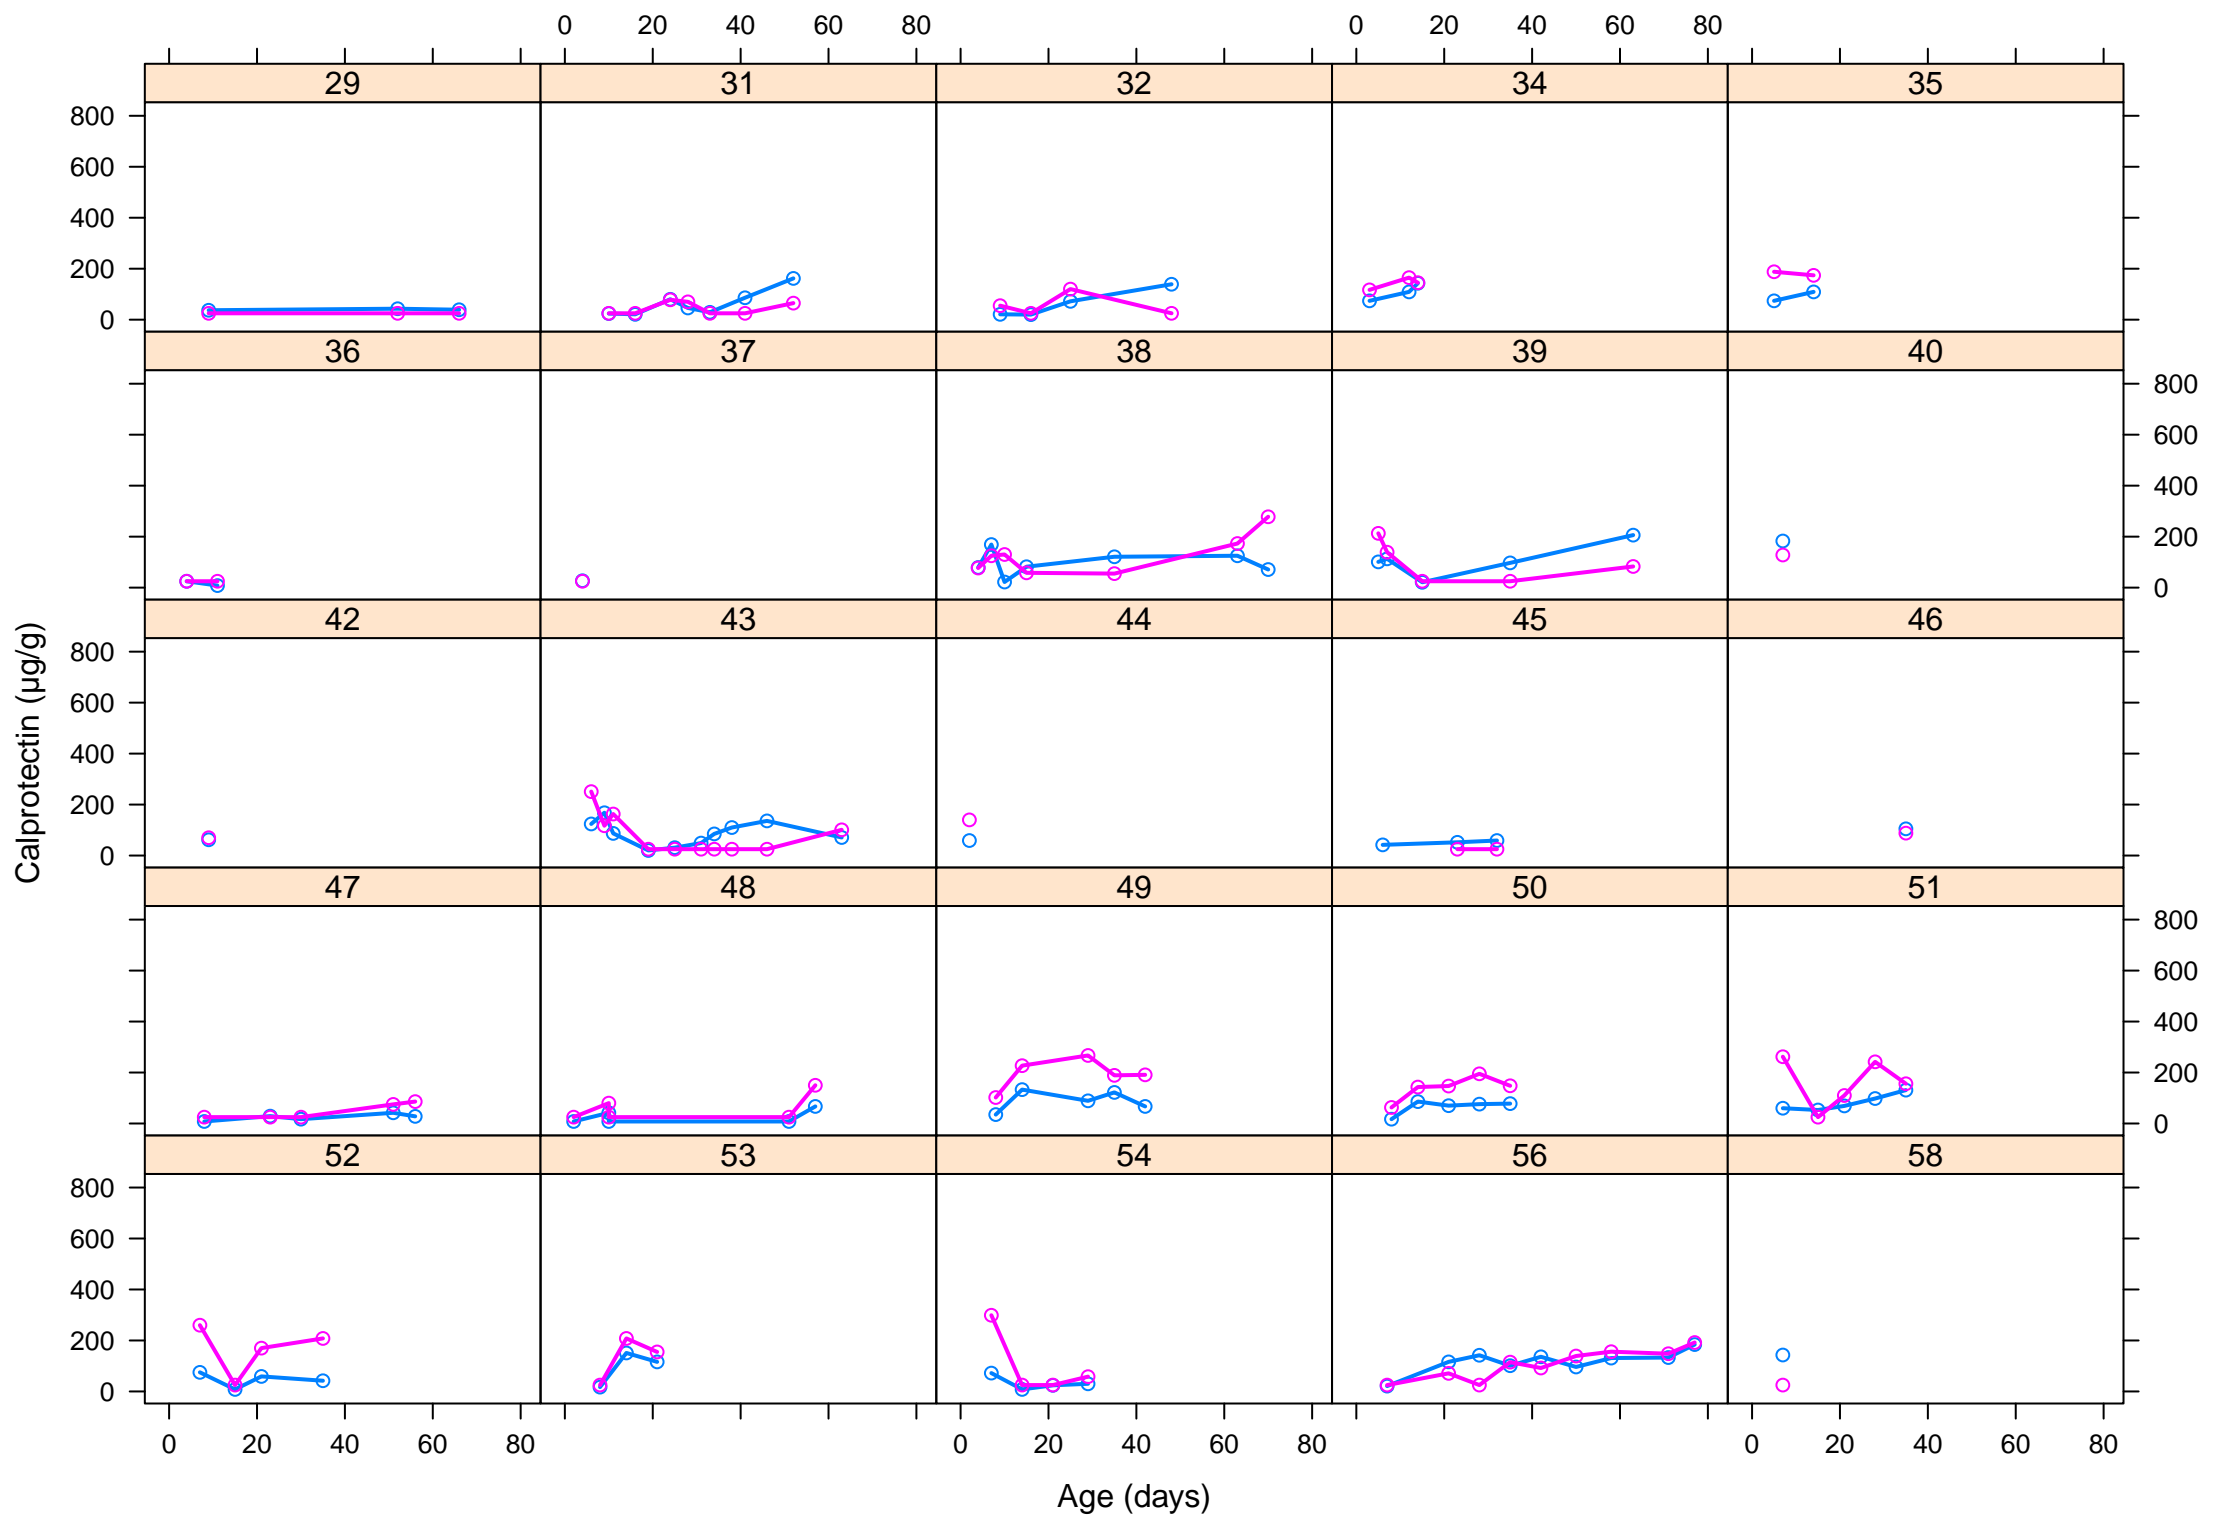

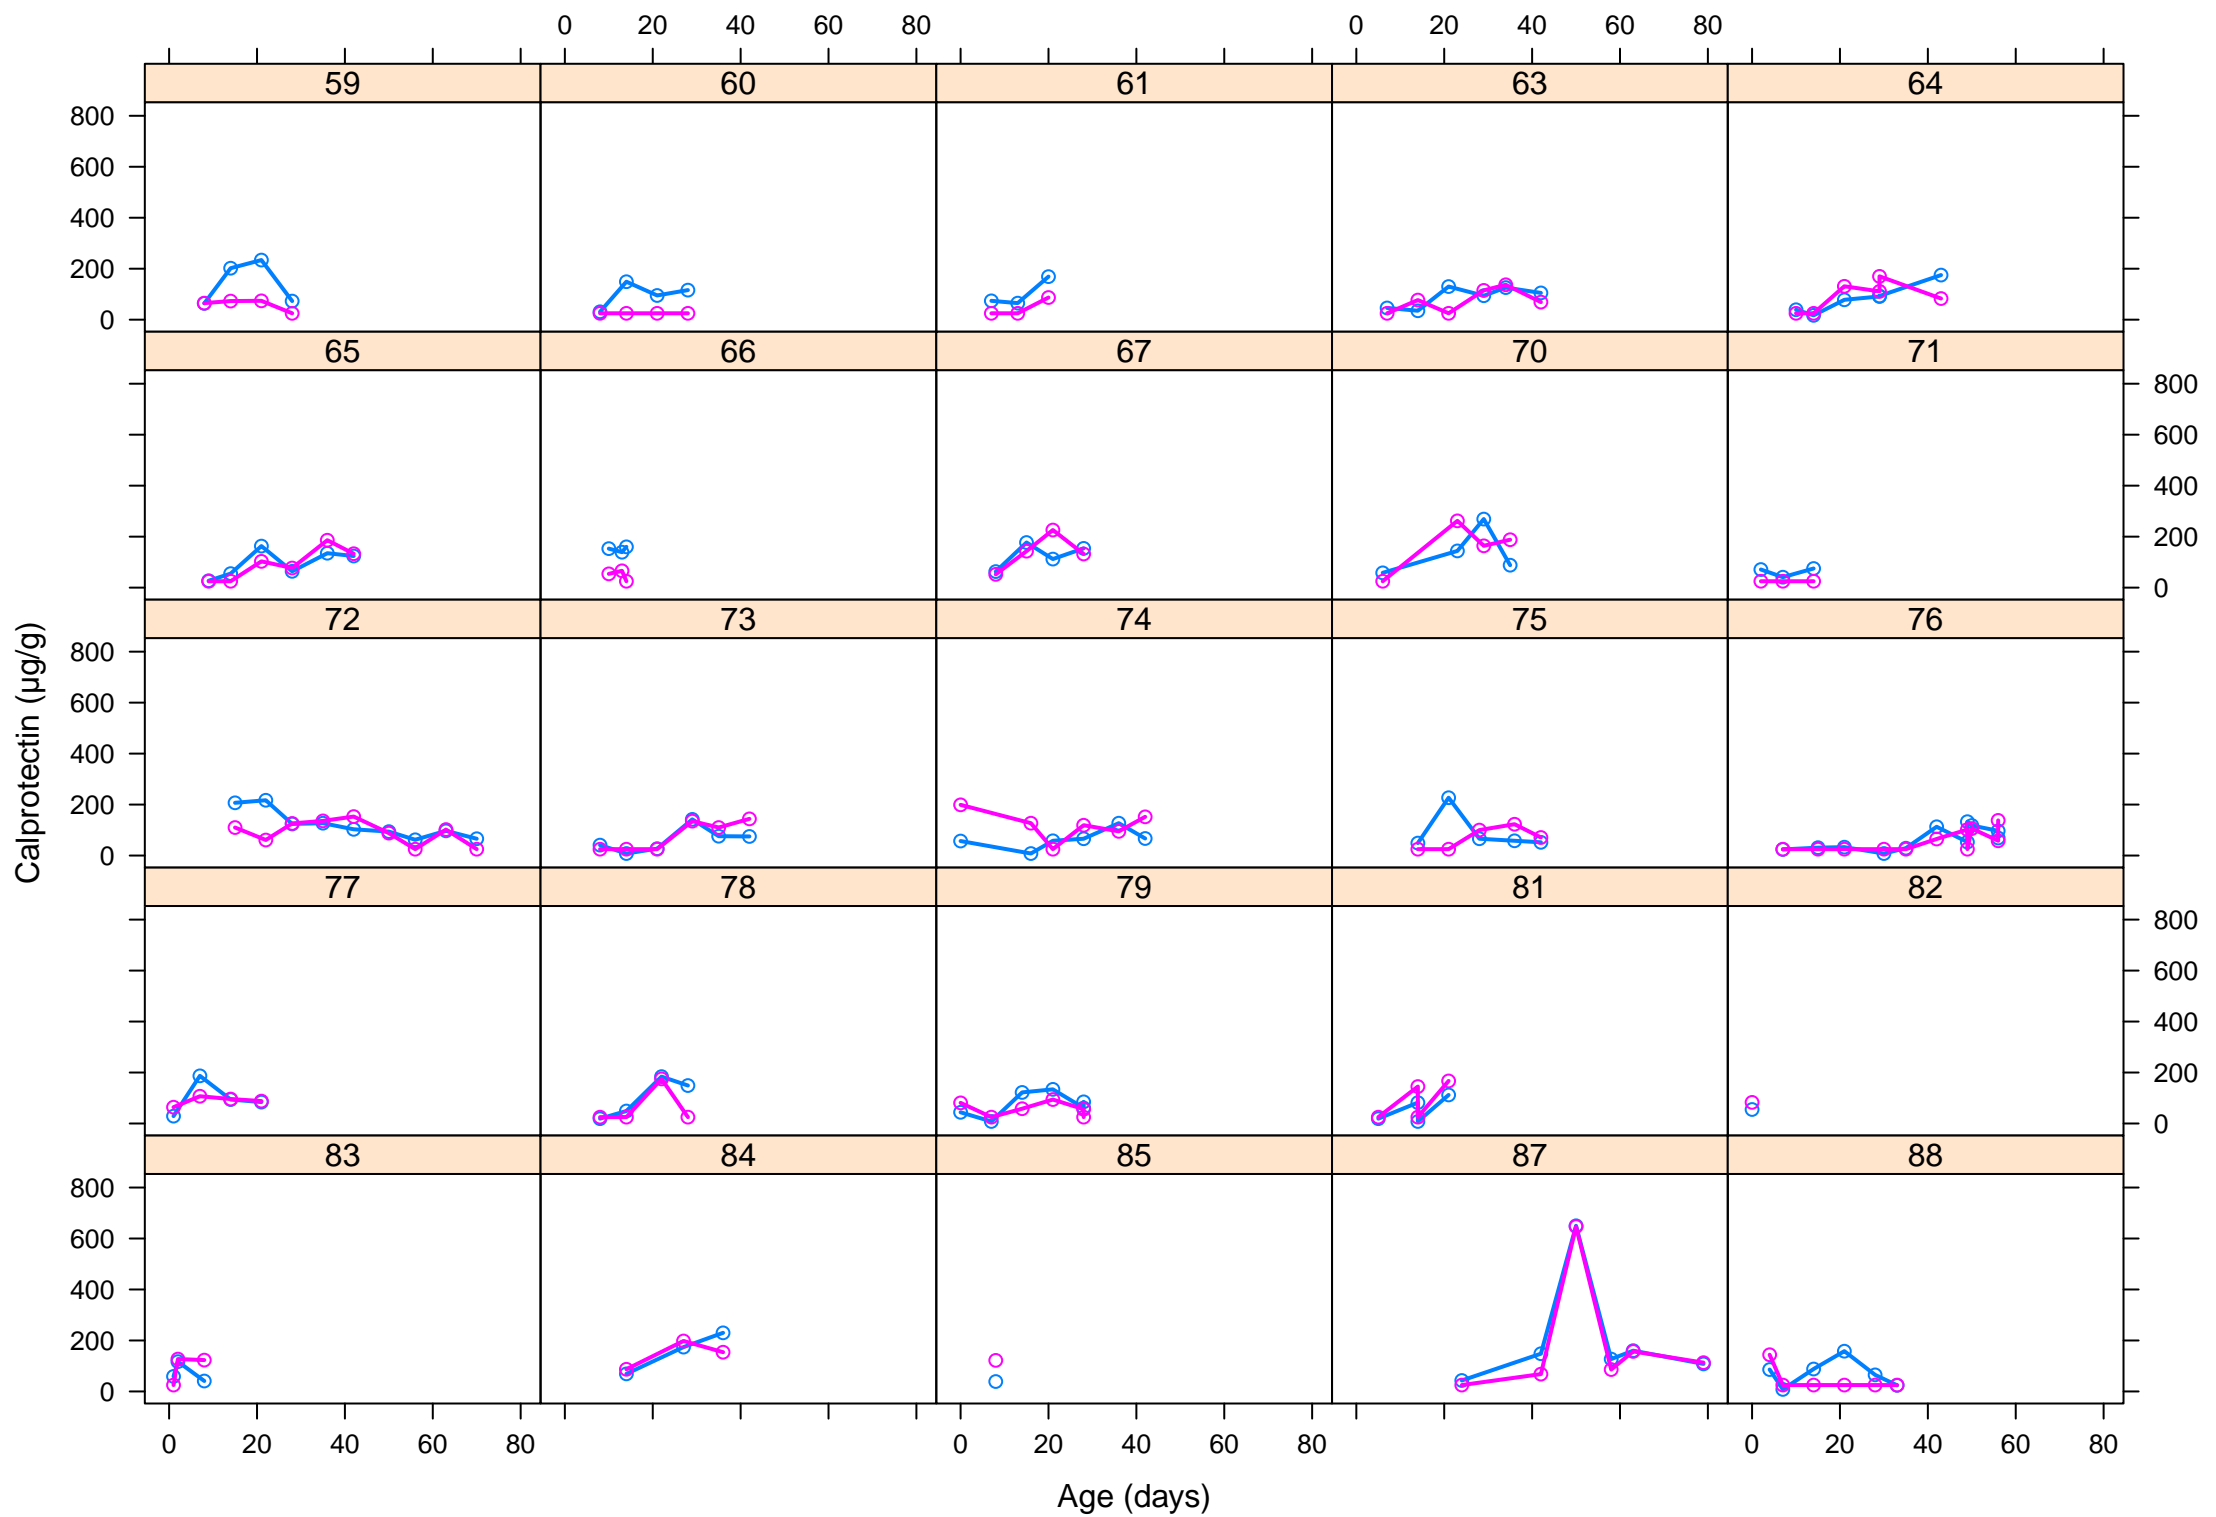

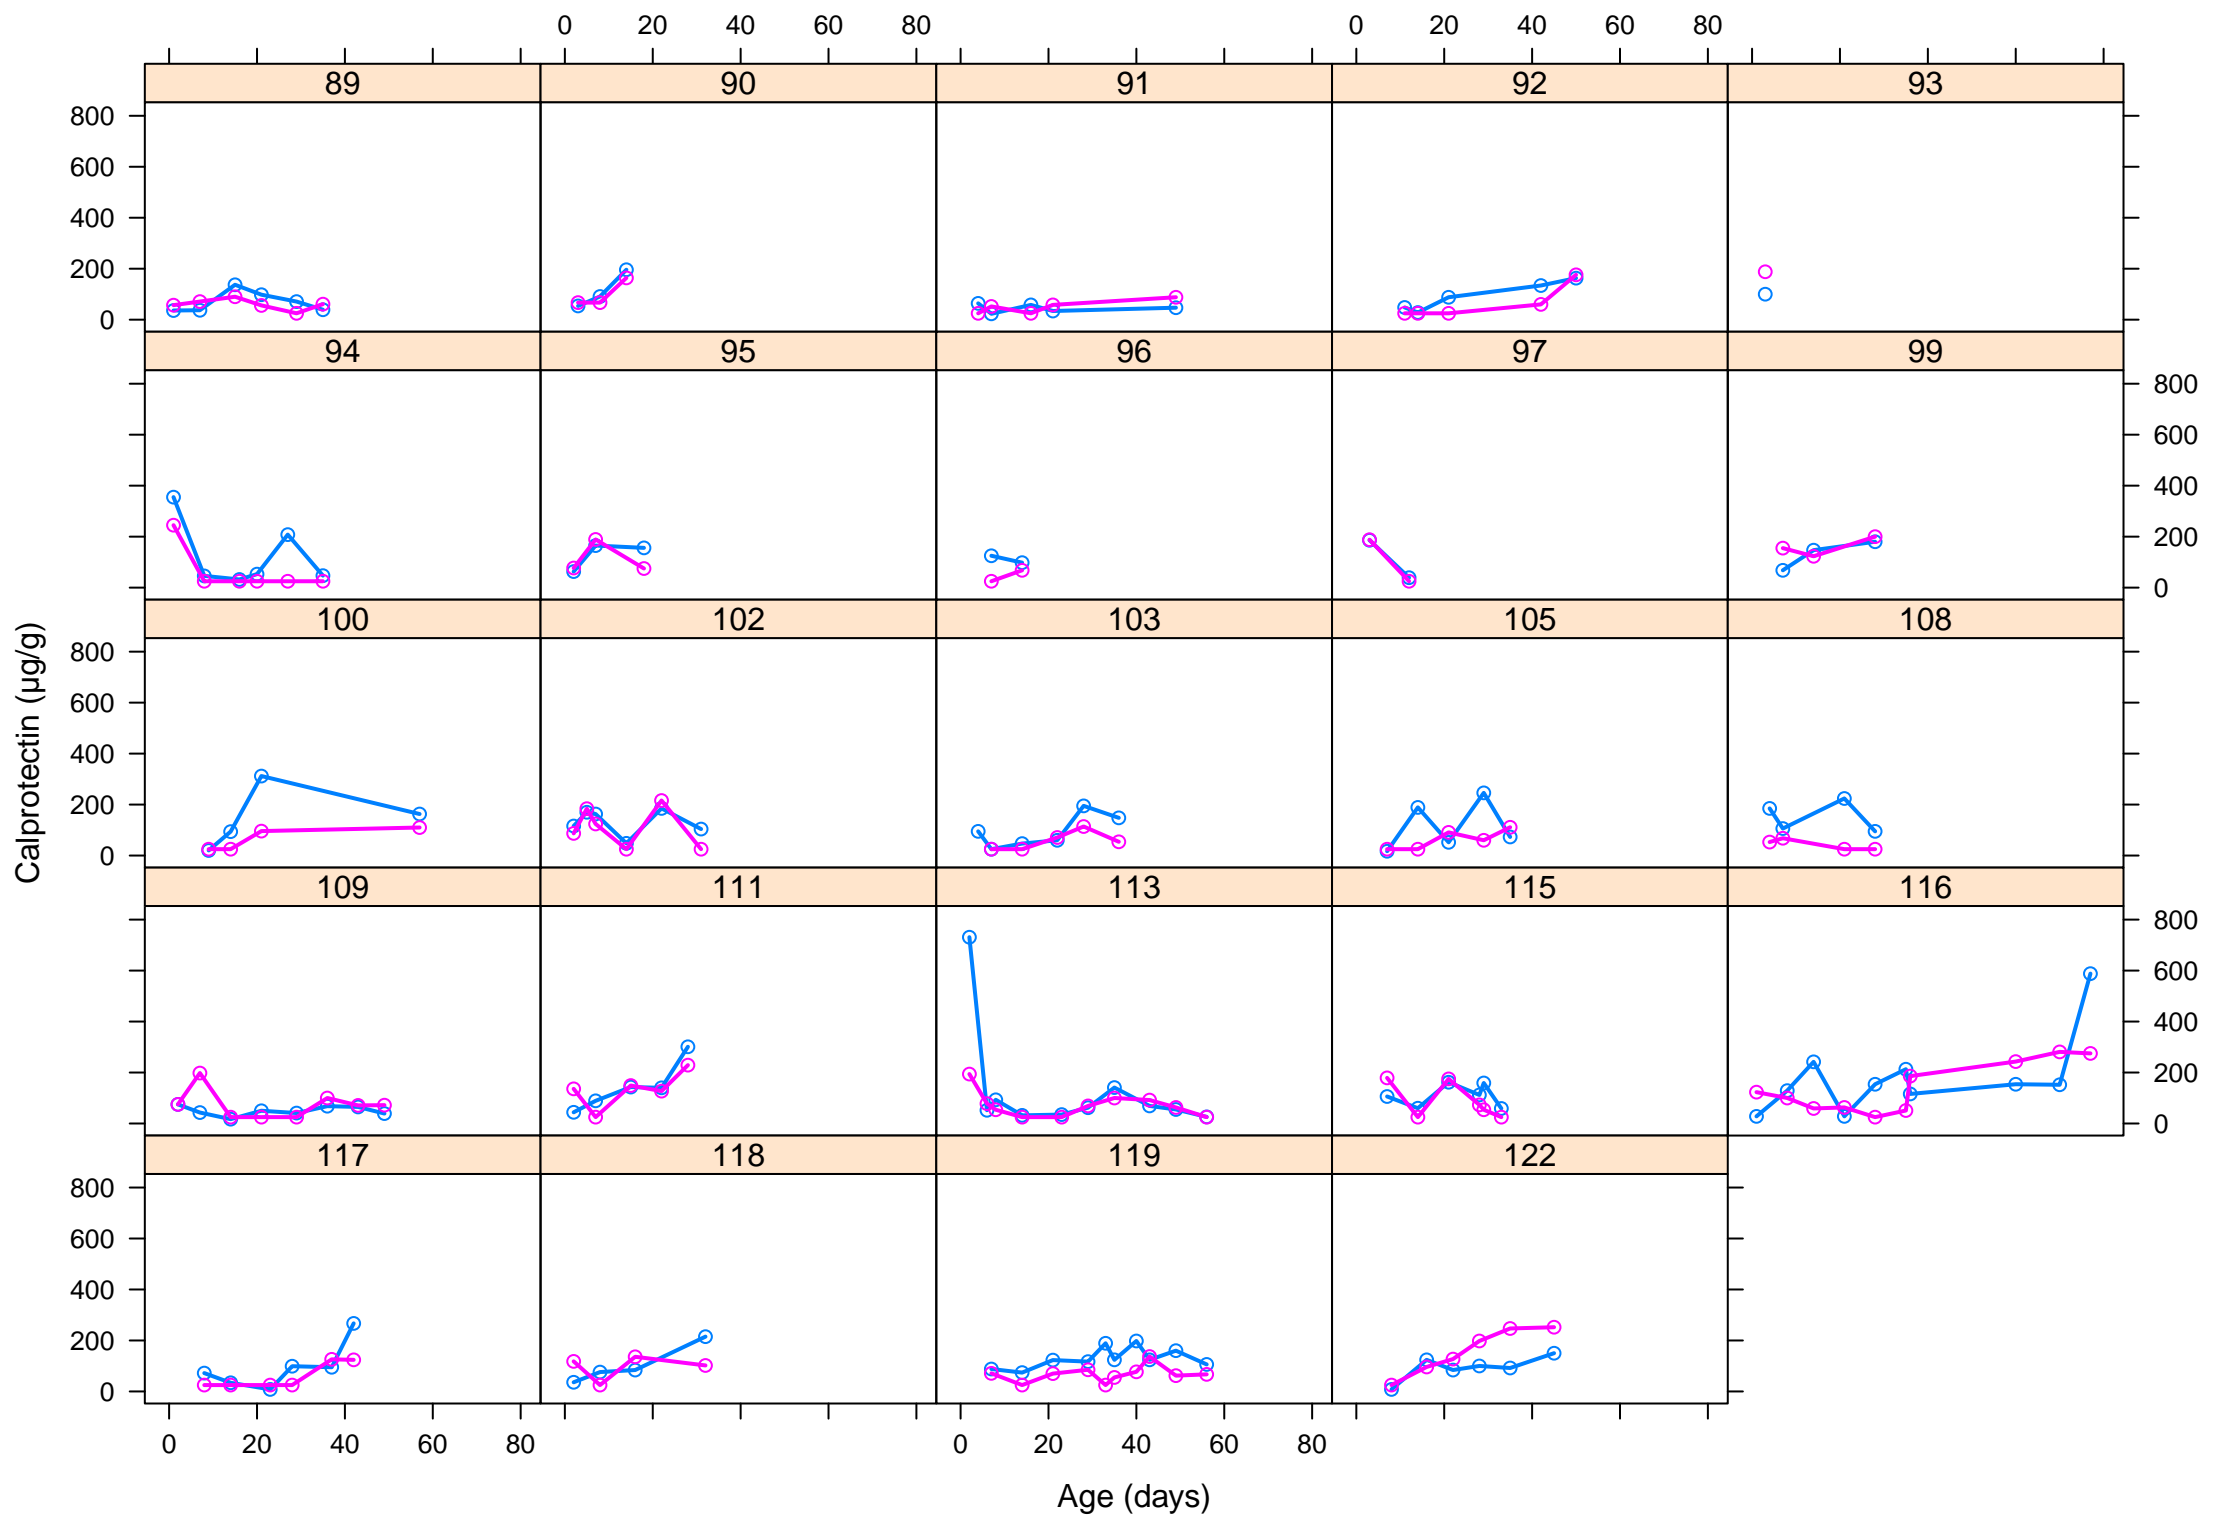

Supplement: APA-110-109-s002.pdf [file APA-110-109-s002.pdf]
